# Supplementary material for: Internal dynamics in the molecular complex of CF3CN and H2O
Source: Royal Society of Chemistry journal article supplement (doi:10.1039/c5cp01550b), 2015-01-01
Supplement: c5cp01550b1.pdf [file c5cp01550b1.pdf]

**Table S1.** Newly measured frequencies of CF<sub>3</sub>CN-Ar, MHz<sup>a</sup>

| J' <sub>K<sub>a</sub> K<sub>c</sub></sub> | J'' <sub>K<sub>a</sub> K<sub>c</sub></sub> | F' | F'' | Frequency | o-c <sup>b</sup> |
|-------------------------------------------|--------------------------------------------|----|-----|-----------|------------------|
| 9 <sub>09</sub>                           | 8 <sub>18</sub>                            | 9  | 9   | 16198.916 | 0                |
|                                           |                                            | 8  | 7   | 16199.500 | 1                |
|                                           |                                            | 10 | 9   | 16199.533 | 2                |
|                                           |                                            | 9  | 8   | 16199.718 | 3                |
| 3 <sub>31</sub>                           | 2 <sub>20</sub>                            | 3  | 3   | 16228.826 | -6               |
|                                           |                                            | 3  | 2   | 16229.314 | -8               |
|                                           |                                            | 2  | 1   | 16229.518 | 5                |
|                                           |                                            | 4  | 3   | 16229.534 | -4               |
| 3 <sub>30</sub>                           | 2 <sub>21</sub>                            | 2  | 2   | 16230.266 | -8               |
|                                           |                                            | 3  | 3   | 16236.540 | -4               |
|                                           |                                            | 3  | 2   | 16237.103 | -2               |
|                                           |                                            | 2  | 1   | 16237.180 | -2               |
| 10 <sub>19</sub>                          | 9 <sub>28</sub>                            | 4  | 3   | 16237.246 | -1               |
|                                           |                                            | 2  | 2   | 16238.055 | 0                |
|                                           |                                            | 9  | 8   | 16316.511 | 3                |
|                                           |                                            | 11 | 10  | 16316.584 | 2                |
| 9 <sub>19</sub>                           | 8 <sub>18</sub>                            | 10 | 9   | 16317.357 | 0                |
|                                           |                                            | 9  | 8   | 16597.408 | 3                |
|                                           |                                            | 8  | 7   | 16597.447 | -4               |
|                                           |                                            | 10 | 9   | 16597.457 | 0                |
| 9 <sub>09</sub>                           | 8 <sub>08</sub>                            | 9  | 8   | 16750.433 | 1                |
|                                           |                                            | 10 | 9   | 16750.583 | -1               |
|                                           |                                            | 8  | 7   | 16750.598 | 3                |
|                                           |                                            | 5  | 5   | 16781.283 | 0                |
| 6 <sub>25</sub>                           | 5 <sub>14</sub>                            | 6  | 5   | 16781.696 | 1                |
|                                           |                                            | 7  | 6   | 16782.880 | 1                |
|                                           |                                            | 5  | 4   | 16783.133 | 1                |
|                                           |                                            | 6  | 6   | 16783.233 | 2                |
| 5 <sub>23</sub>                           | 4 <sub>14</sub>                            | 4  | 3   | 16902.890 | -2               |
|                                           |                                            | 6  | 5   | 16903.226 | -1               |
|                                           |                                            | 4  | 4   | 16903.700 | -4               |
|                                           |                                            | 5  | 5   | 16904.057 | -3               |
| 9 <sub>19</sub>                           | 8 <sub>08</sub>                            | 5  | 4   | 16904.703 | -3               |
|                                           |                                            | 9  | 8   | 17148.120 | -1               |
|                                           |                                            | 10 | 9   | 17148.509 | -1               |
|                                           |                                            | 8  | 7   | 17148.547 | 0                |
| 9 <sub>28</sub>                           | 8 <sub>27</sub>                            | 9  | 8   | 17278.758 | -4               |
|                                           |                                            | 10 | 9   | 17278.792 | -5               |
|                                           |                                            | 8  | 7   | 17278.807 | 1                |
|                                           |                                            | 9  | 8   | 17789.337 | 0                |
| 9 <sub>18</sub>                           | 8 <sub>17</sub>                            |    |     |           |                  |

|                   |                 |    |    |           |    |
|-------------------|-----------------|----|----|-----------|----|
|                   |                 | 10 | 9  | 17789.457 | 0  |
|                   |                 | 8  | 7  | 17789.489 | 0  |
| 9 <sub>27</sub>   | 8 <sub>26</sub> | 10 | 9  | 17935.136 | -6 |
|                   |                 | 8  | 7  | 17935.146 | -3 |
|                   |                 | 9  | 8  | 17935.254 | -3 |
| 10 <sub>010</sub> | 9 <sub>19</sub> | 9  | 8  | 18127.267 | -2 |
|                   |                 | 11 | 10 | 18127.292 | 3  |
|                   |                 | 10 | 9  | 18127.399 | 0  |
| 4 <sub>32</sub>   | 3 <sub>21</sub> | 4  | 3  | 18148.040 | 1  |
|                   |                 | 4  | 4  | 18148.229 | 4  |
|                   |                 | 3  | 3  | 18148.229 | -1 |
|                   |                 | 5  | 4  | 18148.379 | 2  |
|                   |                 | 3  | 2  | 18148.479 | -2 |
| 4 <sub>31</sub>   | 3 <sub>21</sub> | 4  | 3  | 18187.161 | 0  |
|                   |                 | 4  | 4  | 18187.161 | 0  |
|                   |                 | 5  | 4  | 18187.308 | 3  |
|                   |                 | 3  | 3  | 18187.340 | -2 |
|                   |                 | 3  | 2  | 18187.340 | -2 |
| 7 <sub>26</sub>   | 6 <sub>15</sub> | 6  | 6  | 18291.128 | -3 |
|                   |                 | 7  | 6  | 18291.542 | 0  |
|                   |                 | 8  | 7  | 18292.687 | 1  |
|                   |                 | 6  | 5  | 18292.884 | 0  |
| 10 <sub>110</sub> | 9 <sub>19</sub> | 10 | 9  | 18407.777 | 0  |
|                   |                 | 9  | 8  | 18407.824 | 0  |
|                   |                 | 11 | 10 | 18407.824 | -4 |
| 10 <sub>010</sub> | 9 <sub>09</sub> | 10 | 9  | 18525.086 | -2 |
|                   |                 | 11 | 10 | 18525.218 | 3  |
|                   |                 | 9  | 8  | 18525.218 | -3 |

<sup>a</sup> Previously measured transitions can be found in reference 14.

<sup>b</sup> Observed minus calculated frequencies in kHz.

**Table S2.** Spectroscopic constants of CF<sub>3</sub>CN-Ar.

|                              | Lin <i>et al</i> <sup>14</sup> | This work     |
|------------------------------|--------------------------------|---------------|
| $A$ /MHz                     | 3053.0903(2)                   | 3053.0897(2)  |
| $B$ /MHz                     | 1039.9570(2)                   | 1039.95688(9) |
| $C$ /MHz                     | 895.5788(1)                    | 895.57932(9)  |
| $\Delta_J$ /kHz              | 2.687(1)                       | 2.6889(6)     |
| $\Delta_{JK}$ /kHz           | 15.904(8)                      | 15.928(4)     |
| $\Delta_K$ /kHz              | -12.38(2)                      | -12.45(2)     |
| $\delta_J$ /kHz              | 0.4258(8)                      | 0.4260(2)     |
| $\delta_K$ /kHz              | 7.05(5)                        | 6.93(3)       |
| $\chi_{aa}$ /MHz             | 1.746(1)                       | 1.747(1)      |
| $\chi_{bb} - \chi_{cc}$ /MHz | -6.426(2)                      | -6.425(3)     |
| N                            | 133                            | 201           |
| $\sigma$ /kHz                | 2                              | 2             |

**Table S3.** Measured frequencies of CF<sub>3</sub>CN-H<sub>2</sub>O in MHz

|                     |                      | A state |           |                  | B state   |                  |
|---------------------|----------------------|---------|-----------|------------------|-----------|------------------|
| J' <sub>Ka Kc</sub> | J'' <sub>Ka Kc</sub> | F' F''  | Frequency | o-c <sup>a</sup> | Frequency | o-c <sup>a</sup> |
| <i>a</i> -type      |                      |         |           |                  |           |                  |
| 5 <sub>15</sub>     | 4 <sub>14</sub>      | 5 5     | 16314.234 | -1               | 16312.886 | -2               |
|                     |                      | 5 4     | 16315.175 | 3                | 16313.827 | 1                |
|                     |                      | 4 3     | 16315.239 | 1                | 16313.892 | 1                |
|                     |                      | 6 5     | 16315.270 | 2                | 16313.923 | 1                |
|                     |                      | 4 4     | 16316.415 | 0                | 16315.070 | 0                |
| 5 <sub>05</sub>     | 4 <sub>04</sub>      | 5 5     | 16462.732 | -1               | 16461.031 | -1               |
|                     |                      | 5 4     | 16463.479 | 1                | 16461.779 | 0                |
|                     |                      | 6 5     | 16463.684 | 2                | 16461.984 | 1                |
|                     |                      | 4 4     | 16464.621 | 0                | 16462.922 | -1               |
| 3 <sub>21</sub>     | 2 <sub>02</sub>      | 2 1     | 16837.243 | 3                | 16826.515 | 5                |
|                     |                      | 4 3     | 16837.517 | -0               | 16826.785 | -3               |
|                     |                      | 3 2     | 16838.218 | -3               | 16827.491 | -2               |
| 5 <sub>24</sub>     | 4 <sub>23</sub>      | 5 4     | 17472.657 | 0                | 17470.278 | 0                |
|                     |                      | 6 5     | 17472.734 | 3                | 17470.356 | 4                |
|                     |                      | 4 3     |           |                  | 17470.356 | -1               |
| 5 <sub>41</sub>     | 5 <sub>40</sub>      | 4 3     | 17903.411 | 0                | 17900.986 | 0                |
|                     |                      | 6 5     | 17903.450 | -2               | 17901.021 | -4               |
|                     |                      | 5 4     | 17903.633 | 0                | 17901.205 | 2                |
| 5 <sub>32</sub>     | 4 <sub>31</sub>      | 4 4     |           |                  | 18140.961 | 2                |
|                     |                      | 4 3     | 18143.687 | 2                | 18141.255 | 4                |
|                     |                      | 6 5     | 18143.720 | -1               | 18141.285 | -2               |
|                     |                      | 5 4     | 18143.958 | -1               | 18141.524 | 1                |
|                     |                      | 5 5     |           |                  | 18141.750 | -6               |
| 5 <sub>14</sub>     | 4 <sub>13</sub>      | 4 4     | 18195.072 | -1               | 18191.730 | -1               |
|                     |                      | 5 4     | 18195.613 | 0                | 18192.266 | 0                |
|                     |                      | 6 5     | 18195.841 | 0                | 18192.492 | -1               |
|                     |                      | 4 3     | 18195.924 | 1                | 18192.574 | 2                |
|                     |                      | 5 5     | 18196.28  | -3               | 18192.934 | -2               |
| <i>b</i> -type      |                      |         |           |                  |           |                  |
| 5 <sub>05</sub>     | 4 <sub>14</sub>      | 5 5     |           |                  | 16183.365 | -2               |
|                     |                      | 4 3     | 16185.199 | 0                | 16184.270 | 3                |
|                     |                      | 6 5     | 16185.248 | -6               | 16184.313 | -4               |
|                     |                      | 4 4     | 16186.378 | 0                | 16185.448 | 0                |
| 5 <sub>15</sub>     | 4 <sub>04</sub>      | 5 5     | 16592.668 | -2               | 16590.552 | -2               |
|                     |                      | 5 4     | 16593.416 | 1                | 16591.301 | 0                |
|                     |                      | 6 5     | 16593.705 | 2                | 16591.591 | 3                |
|                     |                      | 4 3     | 16593.719 | -3               |           |                  |
|                     |                      | 4 4     | 16594.658 | 0                | 16592.544 | 0                |

|                 |                 |     |           |    |           |    |
|-----------------|-----------------|-----|-----------|----|-----------|----|
| 6 <sub>24</sub> | 5 <sub>33</sub> | 5 4 | 17025.087 | 2  | 17031.469 | 3  |
|                 |                 | 7 6 | 17025.199 | -2 | 17031.580 | -1 |
|                 |                 | 6 5 | 17025.927 | 0  | 17031.302 | -2 |
| 4 <sub>23</sub> | 3 <sub>12</sub> | 4 3 | 17123.737 | 0  | 17116.114 | -1 |
|                 |                 | 4 4 |           |    | 17116.114 | -1 |
|                 |                 | 5 4 | 17124.576 | 0  | 17116.952 | 1  |
| 3 <sub>31</sub> | 2 <sub>20</sub> | 3 2 | 17124.867 | 0  | 17117.241 | 0  |
|                 |                 | 3 2 | 17678.709 | -3 | 17665.846 | 1  |
|                 |                 | 4 3 | 17678.907 | -2 | 17666.042 | 1  |
| 3 <sub>30</sub> | 2 <sub>21</sub> | 2 1 | 17679.013 | 4  | 17666.140 | -1 |
|                 |                 | 2 1 | 17786.786 | 0  | 17773.905 | 0  |
|                 |                 | 4 3 | 17786.830 | 2  | 17773.950 | 3  |
|                 |                 | 3 2 | 17786.894 | -2 | 17774.013 | -3 |

---

<sup>a</sup> Observed minus calculated frequencies in kHz.
